# Supplementary material for: Evolution of Attenuation and Risk of Reversal in Peste des Petits Ruminants Vaccine Strain Nigeria 75/1
Source: PubMed Central journal article supplement (PMC6724400; doi:10.3390/v11080724), 2019-08-07
Supplement: viruses-11-00724-s001.pdf [file viruses-11-00724-s001.pdf]

## Supplementary material

**Table S1:** Primer set used for long fragment analysis of the PPRV genome

|                                                                                                                                                        |
|--------------------------------------------------------------------------------------------------------------------------------------------------------|
| <p><b>Fragment 1 (4050 bp)</b></p> <p><i>PPRV-3F</i></p> <p>CAAACAAAGTTGGGTAAGGA</p> <p><i>PPRV-4053R</i></p> <p>TTCTCCCATGAGCCGACTATGTA</p>           |
| <p><b>Fragment 2 (3663 bp)</b></p> <p><i>PPRV-3394F</i></p> <p>TATTACAAAAAAGTTAGGAGCAAGGG</p> <p><i>PPRV-7057R</i></p> <p>CAGCAGCATATTAATGTGACAAG</p>  |
| <p><b>Fragment 3 (3816 bp)</b></p> <p><i>PPR-6025F</i></p> <p>CTTGCAAATAAGGAGACCATACT</p> <p><i>PPRV-9841R</i></p> <p>GGCATATATGGGACTGTTCTTT</p>       |
| <p><b>Fragment 4 (3800 bp)</b></p> <p><i>PPRV-9247F</i></p> <p>CACAACCCAGCCAACAATGTTAT</p> <p><i>PPRV-13066R</i></p> <p>GCTAGCATCCAAGCTTCACTCCATGA</p> |
| <p><b>Fragment F5 (3335 bp)</b></p> <p><i>PPR-12607F</i></p> <p>CGCCTTCCAATTATGATTA</p> <p><i>PPRV-15942R</i></p> <p>GAGACAAAGCTGGGAATAGA</p>          |

**Table S2:** Pairwise Manhattan distances calculated based on the base frequencies and the consensus sequences (diagonal from top/left to bottom/right highlighted in bold), the base frequencies in the populations (above the diagonal), or the consensus sequences (below the diagonal), respectively

|         | WTcons   | P47CHS1     | P50         | P58         | P62         | P65         | P67         | P69         | P70         | P75         | Vaccin      | P75C5       | P75C10      | P80         | P85         | P90         | P99         | P130         | P149        |
|---------|----------|-------------|-------------|-------------|-------------|-------------|-------------|-------------|-------------|-------------|-------------|-------------|-------------|-------------|-------------|-------------|-------------|--------------|-------------|
| WTcons  | <b>0</b> | 49.7        | 39.8        | 62.7        | 52.9        | 53.8        | 46.1        | 61.2        | 72.7        | 58.7        | 59.2        | 71.1        | 59.4        | 50.8        | 60.9        | 60.5        | 61.4        | 69.1         | 62.9        |
| P47CHS1 | 28       | <b>32.6</b> | 36.4        | 43.8        | 41.9        | 39.3        | 35.3        | 48.4        | 53.5        | 34.9        | 40.9        | 54.4        | 43.9        | 49.8        | 38.1        | 52.2        | 48.6        | 48.9         | 48.8        |
| P50     | 24       | 4           | <b>16.1</b> | 43.5        | 36.6        | 31.3        | 24.2        | 46.1        | 54.01       | 40.3        | 39.9        | 53.9        | 42.2        | 34.4        | 43.6        | 41.5        | 46.9        | 53.7         | 45.3        |
| P58     | 32       | 12          | 8           | <b>36.7</b> | 34.4        | 31.4        | 32.6        | 29.3        | 44.7        | 25.7        | 26.2        | 47.3        | 37.6        | 48.1        | 38.3        | 54.5        | 38.9        | 49.3         | 44.2        |
| P62     | 32       | 12          | 8           | 4           | <b>25.5</b> | 26.6        | 22.2        | 32.9        | 42.5        | 27.1        | 27.5        | 41.6        | 30.04       | 34.6        | 31.6        | 45.9        | 33.29       | 41.8         | 34.4        |
| P65     | 32       | 12          | 8           | 4           | 0           | <b>22.6</b> | 17.2        | 32.3        | 44.7        | 29.9        | 30.3        | 43.7        | 32.1        | 33.3        | 32.7        | 43.1        | 36.1        | 42.2         | 34.8        |
| P67     | 32       | 12          | 8           | 4           | 0           | 0           | <b>14.3</b> | 31.23       | 38.9        | 25.03       | 24.8        | 39.4        | 27.4        | 24.3        | 28.8        | 34.7        | 31.7        | 38.5         | 30.4        |
| P69     | 32       | 12          | 8           | 4           | 0           | 0           | 0           | <b>37.3</b> | 35.1        | 25.1        | 26.7        | 47.7        | 36.7        | 44.8        | 39.1        | 51.6        | 34.4        | 49.7         | 43.2        |
| P70     | 32       | 12          | 8           | 4           | 0           | 0           | 0           | 0           | <b>44.9</b> | 30.7        | 39.1        | 59.3        | 49.4        | 52.5        | 43.7        | 51.8        | 48.2        | 51.9         | 53.8        |
| P75     | 32       | 12          | 8           | 4           | 0           | 0           | 0           | 0           | 0           | <b>30.9</b> | 17.2        | 38.6        | 28.5        | 40.3        | 23.4        | 38.7        | 29.8        | 34.9         | 35.9        |
| Vaccin  | 32       | 12          | 8           | 4           | 0           | 0           | 0           | 0           | 0           | 0           | <b>31.7</b> | 36.8        | 23.7        | 33.9        | 28.4        | 47.3        | 31.003      | 42.5         | 36.3        |
| P75C5   | 46       | 26          | 22          | 18          | 14          | 14          | 14          | 14          | 14          | 14          | 14          | <b>38.2</b> | 24.1        | 47.5        | 29.1        | 61.3        | 46.9        | 54.3         | 48.6        |
| P75C10  | 42       | 22          | 18          | 14          | 10          | 10          | 10          | 10          | 10          | 10          | 10          | 4           | <b>28.3</b> | 30.7        | 22.8        | 51.1        | 36.1        | 43.7         | 37.01       |
| P80     | 40       | 20          | 16          | 12          | 8           | 8           | 8           | 8           | 8           | 8           | 8           | 10          | 6           | <b>23.6</b> | 36.3        | 41.02       | 46.1        | 1            | 44.9        |
| P85     | 38       | 18          | 14          | 10          | 6           | 6           | 6           | 6           | 6           | 6           | 6           | 8           | 4           | 2           | <b>31.2</b> | 44.3        | 38.8        | 36.3         | 37.5        |
| P90     | 34       | 14          | 10          | 6           | 2           | 2           | 2           | 2           | 2           | 2           | 2           | 16          | 12          | 6           | 8           | <b>34.7</b> | 48.01       | 47.9         | 51.8        |
| P99     | 38       | 18          | 14          | 10          | 6           | 6           | 6           | 6           | 6           | 6           | 6           | 20          | 16          | 14          | 12          | 8           | <b>36.9</b> | 41.1         | 32.4        |
| P130    | 48       | 28          | 24          | 20          | 16          | 16          | 16          | 16          | 16          | 16          | 16          | 30          | 26          | 24          | 22          | 18          | 10          | <b>40.45</b> | 28.4        |
| P149    | 44       | 24          | 20          | 16          | 12          | 12          | 12          | 12          | 12          | 12          | 12          | 26          | 22          | 20          | 18          | 14          | 6           | 4            | <b>23.1</b> |

P47CHS1: Passage 47 on Vero cells + one passage on CHS cells; P50: 50<sup>th</sup> passage on Vero cells (like other Ps... in these plots)

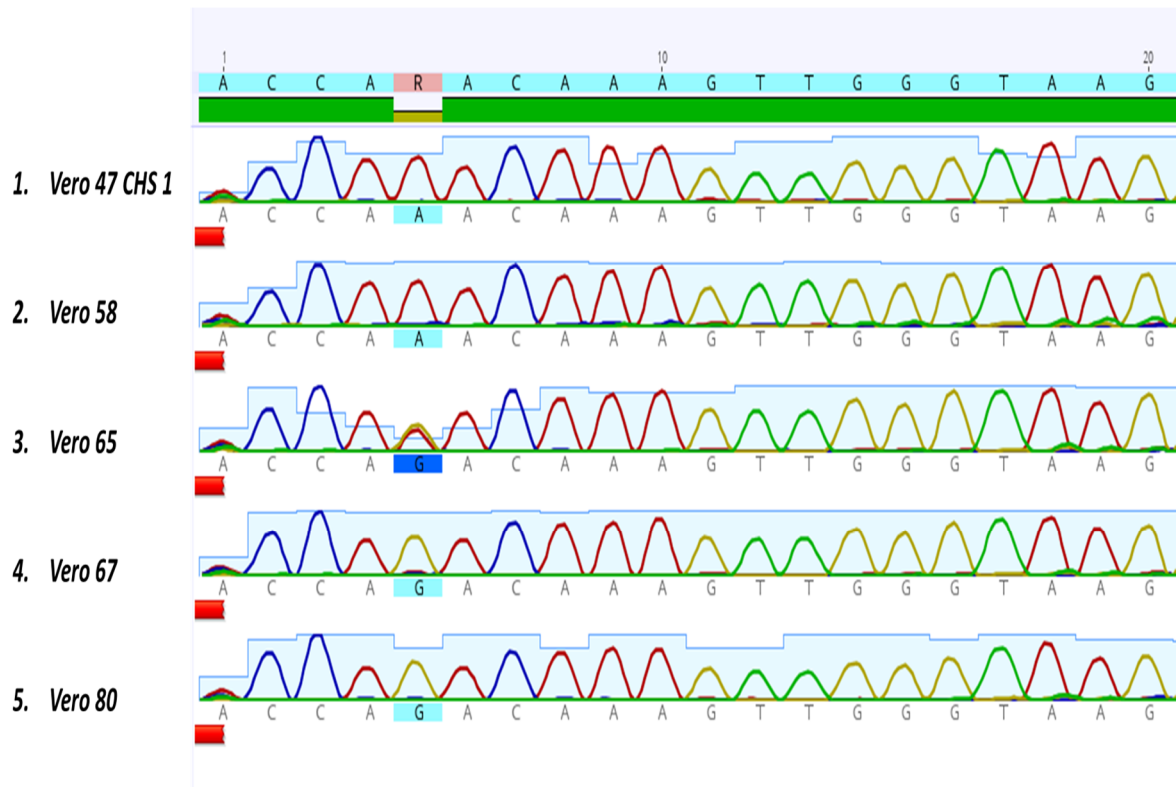

**Figure S1:** Chromatogram alignment of the RACE PCR Sequencing. As can be seen in the figure, we observed a double peak on the 5<sup>th</sup> position of the 65<sup>th</sup> passage on Vero cells.

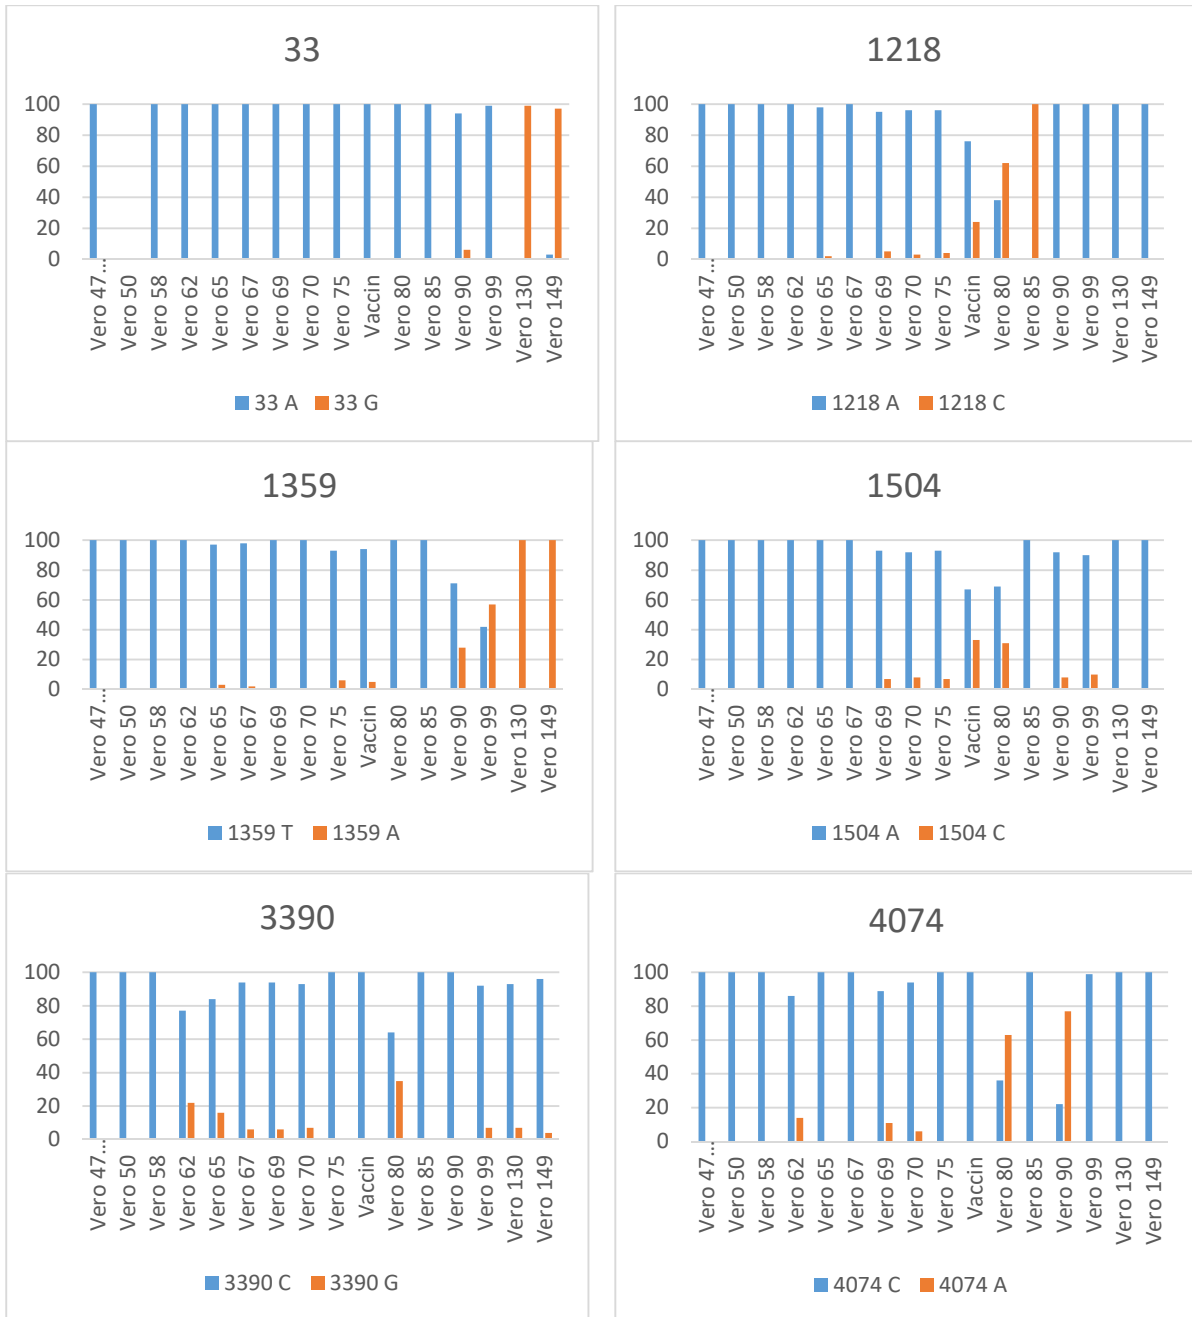

**Figure S2:** Variants appeared and/or disappeared during cell passages. The number at the top of each histogram shows its position in the genome. Orange bars represent the alternative variant, blue bars represent the wild version.
